# Supplementary material
Source: PubMed Central journal article supplement (PMC5808383)
Supplement: Supp_Data.pdf [file Supp_Data.pdf]

## Supplementary Data

### Supplementary Data 1: Intervention Materials

All participants assigned to the intervention group received the following printed back-to-back on a credit-card-sized card (i.e., it could be concealed in a wallet). Participants received two versions of the same card, one in English and one in Xhosa (the home language of all the individuals who enrolled in the study).

Front:

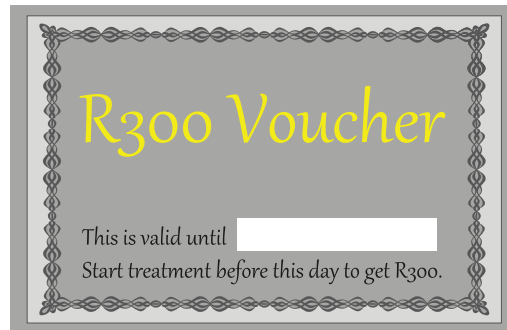

Back:

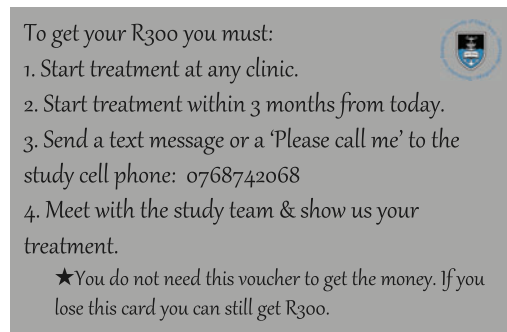

## Supplementary Data 2

SUPPLEMENTARY TABLE S1. INTERVENTION EFFECT ON LINKAGE TO CARE AND ANTIRETROVIRAL THERAPY INITIATION WITH OUTCOME MEASURES CREATED USING SURVEY DATA

|                                | Linkage to care within 3 months |                  |                   | ART initiation within 3 months |                   |                    |
|--------------------------------|---------------------------------|------------------|-------------------|--------------------------------|-------------------|--------------------|
|                                | 1                               | 2                | 3                 | 4                              | 5                 | 6                  |
|                                | % [95% CI]                      | OR [95% CI]      | aOR [95% CI]      | % [95% CI]                     | OR [95% CI]       | aOR [95% CI]       |
| Intervention received          |                                 |                  |                   |                                |                   |                    |
| No                             | 89 [77-99]                      | Ref              | Ref               | 60 [42-78]                     | Ref               | Ref                |
| Yes                            | 87 [75-99]                      | 0.84 [0.17-4.16] | 1.07 [0.16-6.92]  | 65 [48-81]                     | 1.212 [0.43-3.41] | 1.05 [0.30-3.70]   |
| Control variables              |                                 |                  |                   |                                |                   |                    |
| Male (ref: female)             | NA                              | NA               | 0.56 [0.10-3.25]  | NA                             | NA                | 0.75 [0.22-2.58]   |
| Age (years)                    |                                 |                  | 1.03 [0.92-1.16]  |                                |                   | 0.95 [0.88-1.02]   |
| Education (years)              |                                 |                  | 1.12 [0.71-1.77]  |                                |                   | 0.72* [0.50-1.04]  |
| Witnessed ART effect (ref: no) |                                 |                  | 0.68 [0.09-5.14]  |                                |                   | 2.46 [0.66-9.18]   |
| Perceived stigma (ref: none)   |                                 |                  | 1.75 [0.27-11.44] |                                |                   | 0.24** [0.06-0.97] |
| Observations                   | 61                              | 61               | 59                | 61                             | 61                | 59                 |

\*\*\* $p < 0.01$ , \*\* $p < 0.05$ , \* $p < 0.1$ .

95% CI, 95% confidence interval; aOR, adjusted odds ratio; ART, antiretroviral therapy; NA, not applicable; OR, odds ratio; Ref, the reference category.

SUPPLEMENTARY TABLE S2. INTERVENTION EFFECT ON THE AVERAGE NUMBER OF DAYS TO LINKAGE TO CARE AND ANTIRETROVIRAL THERAPY INITIATION WITH OUTCOME MEASURES CREATED USING SURVEY DATA

|                                | Days to linkage: survey data |                          | Days to ART: survey data |                         |
|--------------------------------|------------------------------|--------------------------|--------------------------|-------------------------|
|                                | 1                            | aOR [95% CI]             | 2                        | aOR [95% CI]            |
| Intervention received          |                              |                          |                          |                         |
| No                             | Ref                          | Ref                      | Ref                      | Ref                     |
| Yes                            | -19.10** [-33.45 to -4.75]   | -16.59* [-36.51 to 3.34] | 3.28 [-18.47 to 25.03]   | -0.77 [-2.00 to 0.47]   |
| Control variables              |                              |                          |                          |                         |
| Male (ref: female)             | -10.41 [-25.05 to 4.24]      |                          | 0.14 [-4.79 to 5.08]     | 0.14 [-4.79 to 5.08]    |
| Age (years)                    | 0.22 [-0.65 to 1.09]         |                          | -5.80 [-27.20 to 15.60]  | -4.40 [-22.58 to 13.77] |
| Education (years)              | 1.77 [-1.94 to 5.47]         |                          |                          |                         |
| Witnessed ART effect (ref: no) | -7.59 [-22.32 to 7.14]       |                          |                          |                         |
| Perceived stigma (ref: none)   | -11.58 [-26.64 to 3.49]      |                          |                          |                         |
| Observations                   | 49                           | 49                       | 36                       | 36                      |
| r-squared                      | 0.21                         | 0.21                     | 0.13                     | 0.13                    |

\*\*\* $p < 0.01$ , \*\* $p < 0.05$ , \* $p < 0.1$ .

95% CI, 95% confidence interval; aOR, adjusted odds ratio; ART, antiretroviral therapy; Ref, the reference category.
